# Supplementary material for: lnc-MAP3K13-7:1 Inhibits Ovarian GC Proliferation in PCOS via DNMT1 Downregulation-Mediated CDKN1A Promoter Hypomethylation
Source: PubMed Central journal article supplement — Mol Ther. 2020 Nov 17;29(3):1279–93. doi: 10.1016/j.ymthe.2020.11.018 (PMC7934583; doi:10.1016/j.ymthe.2020.11.018), 2020-11-17
Supplement: mmc1.pdf [file mmc1.pdf]

YMTHE, Volume 29

## **Supplemental Information**

**Inc-MAP3K13-7:1 Inhibits Ovarian GC**

**Proliferation in PCOS via DNMT1 Downregulation-**

**Mediated CDKN1A Promoter Hypomethylation**

**Xueying Geng, Jun Zhao, Jiayu Huang, Shang Li, Weiwei Chu, Wang-sheng Wang, Zi-Jiang Chen, and Yanzhi Du**

## Supplemental Figures and legends

### A General info

|                           |                              |
|---------------------------|------------------------------|
| NONCODE TRANSCRIPT ID     | NONHSAT093752.2              |
| NONCODE Gene ID           | NONHSAG036874.2              |
| Chromosome                | chr3                         |
| Start Site                | 184954500                    |
| End Site                  | 184955979                    |
| Strand                    | +                            |
| Exon Number               | 1                            |
| CNCI Score                | -0.1310720                   |
| Length                    | 1479                         |
| Assembly                  | hg38                         |
| Other transcript Versions | NONHSAT093752.1(old version) |

### E

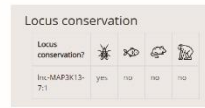

### F

Protein coding potential

| Metric                           | Raw result | Interpretation |
|----------------------------------|------------|----------------|
| PROVEBP processing 2.3           | 0          | non-coding     |
| Lee translation initiation sites | 0          | non-coding     |
| PhyloCSF score                   | 0.7188     | non-coding     |
| CPAT coding probability          | 0.426      | non-coding     |
| Random small ORFs                | 0          | non-coding     |

In stringset with yes

### B

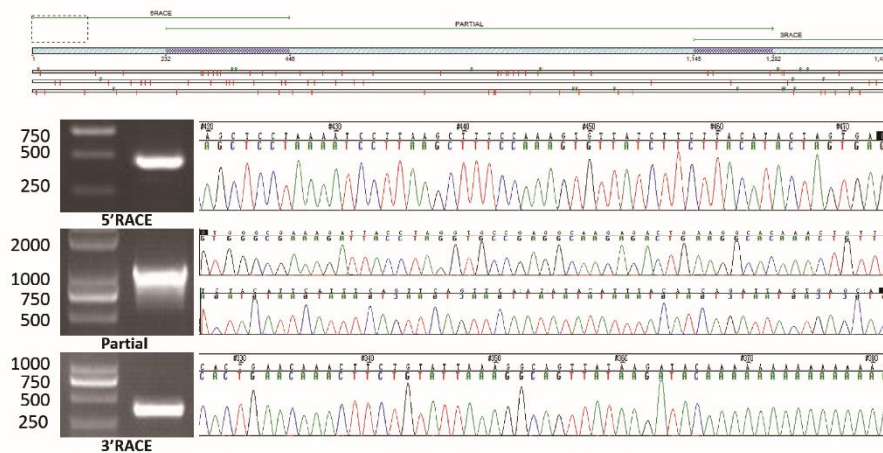

### C

```

CTCAGCTAGTATGTAAGAAATCAACCTTTGGAAAGCTTAAGGATTTTAAAGAGCTGTGTGCTTATTATATCAACAATATTATATCCACATAG
AGAACTGGCGTGTCCCTAGATTTATCATGGCTCTCTCAATTTCCATGATAGGACTTCCGATAGGATTTATCTCAATATCTCTGACT
TTATAGCCCTAGTCCCTGAGTTTTCAGGCCCTCTATCTCTGTTTGTGGGCGAAAGATTACCTAGGTCGCGAGGCAAGAGACTGAAAGCCA
CAAACTGTTTCAGTATAATAAAGAAATAGTAAATAGAATAGTATAACAATAGATATAGAGATGATCATGGACAATATCAATC
ATTATATAAACAATTAATCAATGCTTTTAAATTAATCTCTTGTGCTTACTAATAAACCTAGGAATAACCGGTGGGTATAGGGTCAGGT
GTGACGGGATATTGTGAGAGTGCCTAGAGGCAAGAGGTGAGCTTCTGTCAAGCCACATAAGGCGCTTGAAGGCTCTTTGGTCAA
GTGTAAAGCCAGTGTCTGTAAAGCAGCTTACTTACAGACAGCCGAAAGGAGTCTCTTCTCTGGAGGATCAAGGAAACACTCTGCT
CCACAGCTCTTGTGGAGGCTGGATATATCTAGGCGTCCGCGAGTCACTGGAGGCTTAACCCCTCCCTGTGGTCTGTCTCTGCTCAGT
GGTCACTCTCTGTGCACCTTCATGTCTCCGCTACTCTGTTCTCTTTGAAGTTCGTAGTATAGCAGTAGAAGAAATAGTGAAG
TCTTAAGTATTGATCTTCTTATAGTGCATAGAAGAAACGCTGACATATGCTGCTCTCTATCTCTGCGGTGCTACTAAAGGGGA
AGGGCCCCCTGCCCCATGCTGTGACTTCTCACTTATCACTTAGAAGATTCACTCTTACCTTCCCTGCCCCCTGCTGTGATGCA
ATAAATACAGCAGCCAGCTGTGTGAGGCCACTGCCGGTCTCCGGCTTGTGTGTAGTGGTCCCCCGGCCAGCTATGTCTCTTAT
CTCTTGTCTGTGCTTATTTATTAATCAATCTCTGCTCTGACAGAGGGAAGCACTGTAAGCCCGTAGGACTGAGCCATACAGT
TTTCTCTGTTGAGGCGATCCAAATGACTGCTACATTCATTCAGTTCAGTTCAGTATATATTACATAGATACCTGAGCAGCTATTA
TTATGCTTAAATGAGTAAATATGAAATGAAATACCAATGACTTCAACATGAGTGGTGGGACACACACTTAAAGATGATTTTCA
GTTGTGGGTGAGAACTAAGTGGTGTATACATAGGAAATGGCAGTCACTGAAACAATCTGTGATTAAGAGCAGTATTAAGATCAAAAA
AAAAAAAAA

```

### G

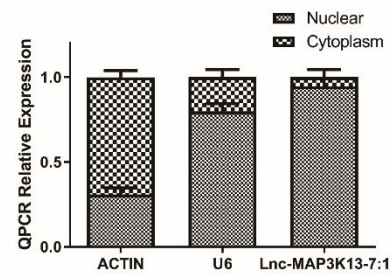

### D

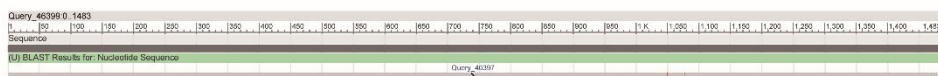

## Figure S1. Characterization of Lnc-MAP3K13-7:1

(A) General information of Lnc-MAP3K13-7:1. Lnc-MAP3K13-7:1 is on chromosome 3, and is the transcription of the forward strand.

(B) Full-length sequence of Lnc-MAP3K13-7:1 was determined by 5' and 3' rapid amplification of cDNA ends (RACE) assays. Top, Schematic diagram of how the RACE fragments are assembled in the contig of Lnc-MAP3K13-7:1. Left, gel electrophoresis images of PCR products from the 5'-RACE and 3'-RACE assays. Right, chromatograms of part of PCR products sequences, indicated the boundary between the primers and Lnc-MAP3K13-7:1 sequences.

(C) The full - length sequence of lnc-MAP3K13-7:1 transcript was 1483 nucleotide.

(D) BLAST results for the sequence of lnc-MAP3K13-7:1 transcript. Green, sequence from RACE. Grey, reference sequence from NONCODE. Red vertical bar, the mismatches between the two sequences, one bar indicates one nucleotide mismatch.

(E, F) Lnc-MAP3K13-7:1 has high evolutionary conservation in humans and fruit flies. The protein coding potential of lnc-MAP3K13-7:1 under several metrics, indicates that lnc-MAP3K13-7:1 is a non-coding RNA.

(G) Quantitative RT-PCR analysis of lnc-MAP3K13-7:1 expression ratio in nuclear and cytoplasm in untreated KGN cells using RNA cellular fractionation assay. ACTIN and U6 were used as cytoplasm RNA control and nuclear RNA control, respectively (n=4, mean  $\pm$  SD).

A

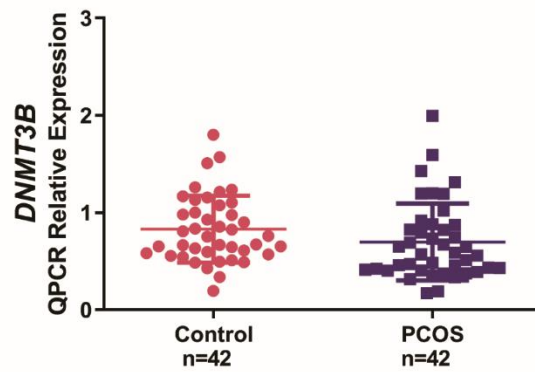

B

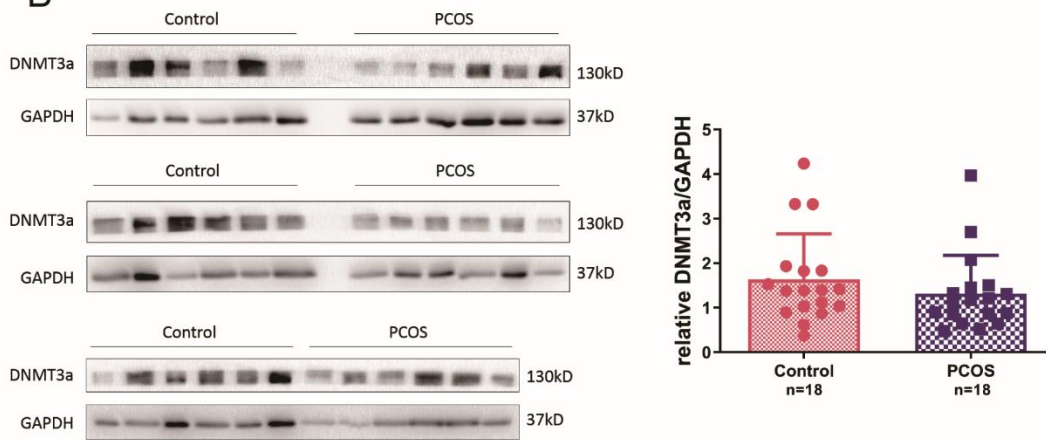

**Figure S2. Expression of DNMT3A and DNMT3B in granulosa cells of patients with PCOS**

(A) Quantitative RT-PCR analysis of *DNMT3B* expression in GCs of 42 PCOS patients and 42 normal controls which is the same cohort with Figure 1A ( $P=0.1072$ ).

(B) Western blot analysis of DNMT3A protein expression in GCs of 18 PCOS and 18 normal controls which is the same cohort with Figure 1E ( $P=0.3059$ ).

Data information: In (A, B), data are presented as mean  $\pm$ SD. Student's *t*-test.

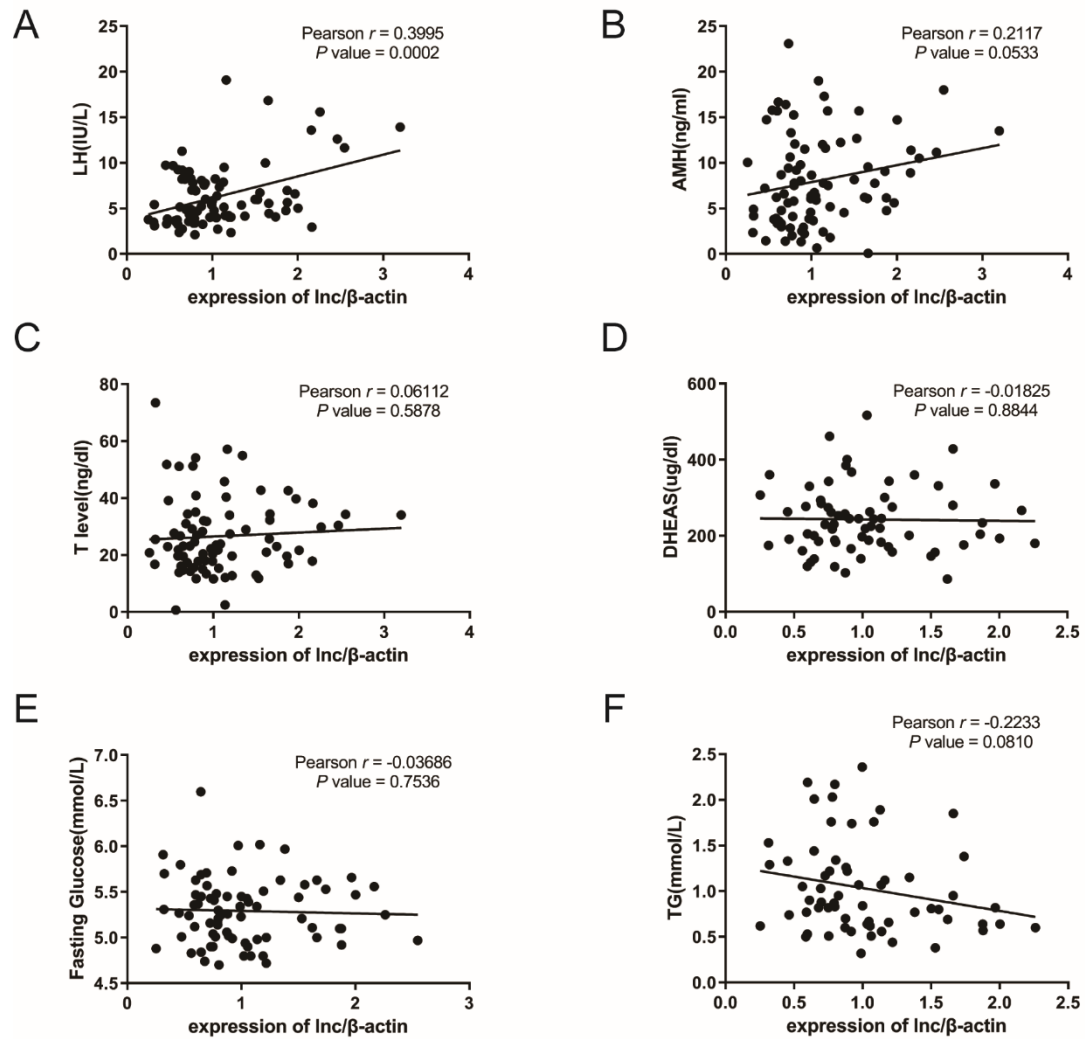

**Figure S3. The correlation between the clinical indicators and the expression level of lnc-MAP3K13-7:1 in PCOS and controls**

(A) The association between the expression of lnc-MAP3K13-7:1 and serum LH levels in 42 PCOS patients and 42 normal controls. The expression level was detected via Quantitative RT-PCR.

(B) The association between the expression of lnc-MAP3K13-7:1 and serum AMH levels in 42 PCOS patients and 42 normal controls.

(C) The association between the expression of lnc-MAP3K13-7:1 and serum T levels in 42 PCOS patients and 42 normal controls.

(D) The association between the expression of lnc-MAP3K13-7:1 and serum DHEAS levels in 42 PCOS patients and 42 normal controls.

(E) The association between the expression of lnc-MAP3K13-7:1 and serum fasting glucose levels in 42 PCOS patients and 42 normal controls.

(F) The association between the expression of lnc-MAP3K13-7:1 and serum TG levels in 42 PCOS patients and 42 normal controls.

Data information: In (A–F), Pearson  $r$  and  $P$  value was shown on the image (Pearson correlation coefficient). LH: luteinizing hormone, AMH: anti-Müllerian hormone, T: testosterone, DHEAS: dehydroepiandrosterone sulfate, TG: triglyceride.



(D) Annexin V-7AAD flow cytometry experiment of transfected vector or vector-lnc-MAP3K13-7:1 KGN cells. The KGN cells basically did not undergo apoptosis after lnc-MAP3K13-7:1 overexpression.

Data information: In (A, D), mean  $\pm$ SD. Student's *t*-test.



A

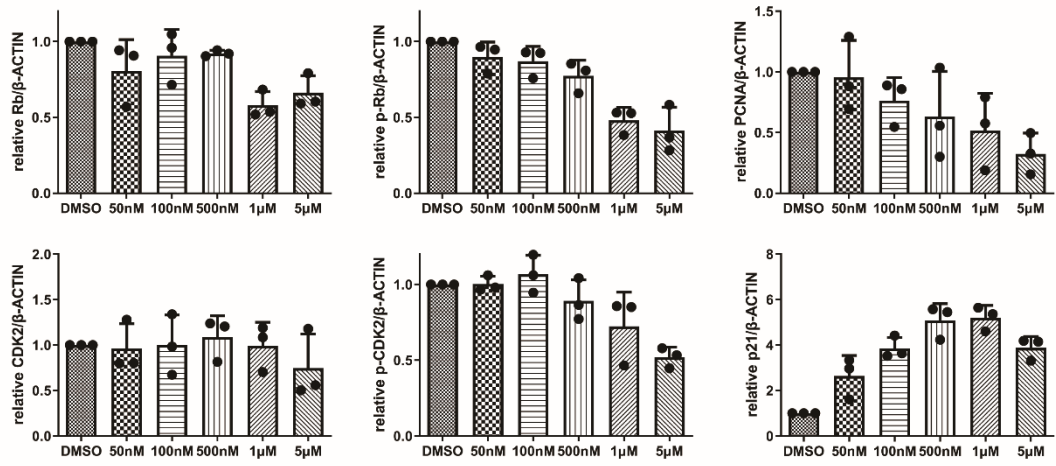

B

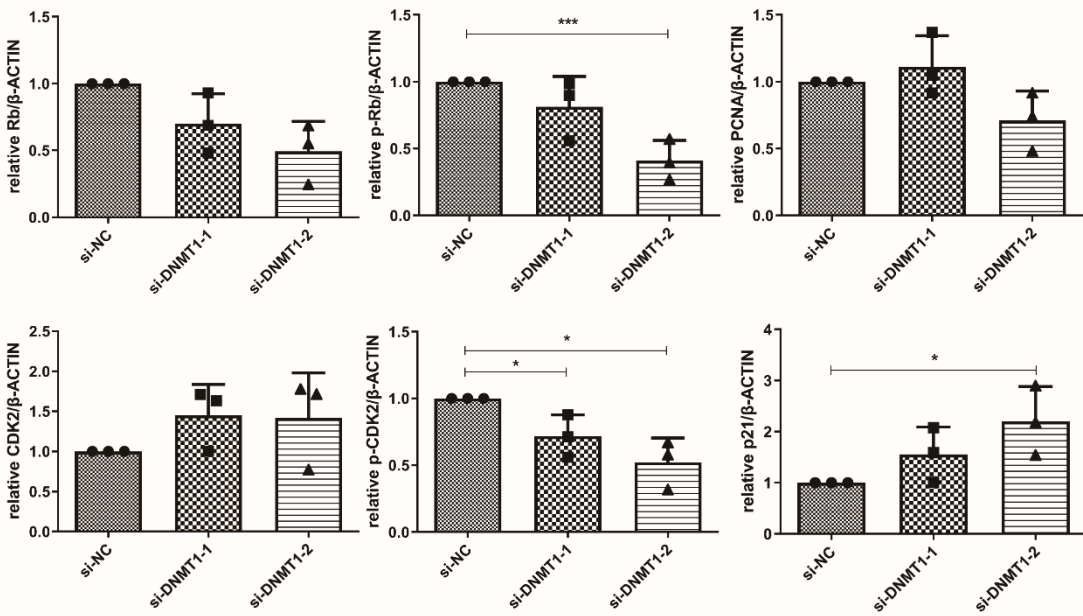

Figure S5. The quantifications of western blot analysis in Figure 3D, 3H

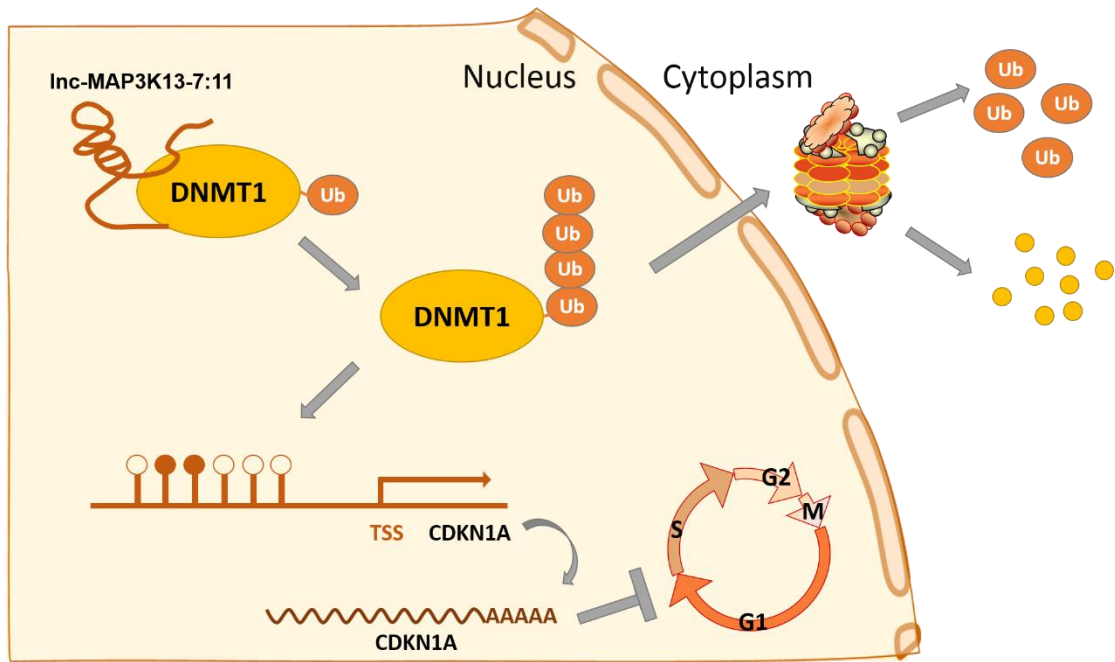

**Figure S6. A proposed model illustrating regulation of CDKN1A expression by lnc-MAP3K13-7:1 - dependent DNMT1 ubiquitination.**

### Supplemental Tables

Table S1 Clinical and biochemical indicators of women with and without PCOS involved in RT-PCR

|                                | PCOS (n=42) | Control (n=42) | P value  |
|--------------------------------|-------------|----------------|----------|
| Age (years)                    | 28.64±2.87  | 29.07±2.65     | 0.4794   |
| BMI (kg/m <sup>2</sup> )       | 22.87±2.92  | 22.62±3.23     | 0.7181   |
| Basal FSH (IU/L)               | 5.99±1.39   | 6.34±1.49      | 0.2772   |
| Basal LH (IU/L)                | 7.71±3.94   | 4.94±1.93      | < 0.0001 |
| LH/FSH                         | 1.31±0.71   | 0.79±0.29      | < 0.0001 |
| T (ng/dL)                      | 33.84±14.25 | 19.96±7.45     | < 0.0001 |
| AMH (ng/mL)                    | 11.13±4.47  | 4.95±3.30      | < 0.0001 |
| Fasting blood-glucose (mmol/L) | 5.33±0.44   | 5.29±0.34      | 0.7048   |
| HOMA-IR                        | 2.86±1.34   |                |          |

Data are presented as mean±SD, BMI: Body mass index, LH: luteinizing hormone, FSH: follicle stimulating hormone, T: testosterone, AMH: anti-Müllerian hormone, HOMA-IR: Fasting blood-glucose (mmol/L)\*fasting insulin (uU/ml)/22.5.

Table S2 Clinical and biochemical indicators of women with and without PCOS involved in western blot assay

|                                | PCOS (n=15) | Control (n=15) | P value  |
|--------------------------------|-------------|----------------|----------|
| Age (years)                    | 28.40±3.46  | 29.47±3.00     | 0.3745   |
| BMI (kg/m <sup>2</sup> )       | 24.05±2.71  | 22.32±2.55     | 0.0814   |
| Basal FSH (IU/L)               | 5.68±0.80   | 6.36±1.01      | 0.0768   |
| Basal LH (IU/L)                | 8.71±4.46   | 5.26±1.38      | 0.0079   |
| LH/FSH                         | 1.52±0.70   | 0.87±0.29      | 0.0022   |
| T (ng/dL)                      | 33.71±14.22 | 16.85±6.85     | 0.0003   |
| AMH (ng/mL)                    | 8.81±4.93   | 2.22±0.63      | < 0.0001 |
| Fasting blood-glucose (mmol/L) | 5.58±0.92   | 5.26±0.43      | 0.2268   |
| HOMA-IR                        | 4.75±2.53   |                |          |

Data are presented as mean±SD, BMI: Body mass index, LH: luteinizing hormone, FSH: follicle stimulating hormone, T: testosterone, AMH: anti-Müllerian hormone, HOMA-IR: Fasting blood-glucose (mmol/L)\*fasting insulin (uU/ml)/22.5.

Table S3 Clinical and biochemical indicators of women with and without PCOS involved in Methylated DNA Quantification Kit

|                                | PCOS (n=25) | Control (n=25) | P value  |
|--------------------------------|-------------|----------------|----------|
| Age (years)                    | 28.44±3.45  | 28.92±3.23     | 0.6139   |
| BMI (kg/m <sup>2</sup> )       | 24.13±3.22  | 22.94±3.37     | 0.2093   |
| Basal FSH (IU/L)               | 5.49±1.20   | 6.15±1.56      | 0.0993   |
| Basal LH (IU/L)                | 7.64±4.00   | 4.90±1.92      | 0.0033   |
| LH/FSH                         | 1.42±0.73   | 0.80±0.28      | 0.0003   |
| T (ng/dL)                      | 40.81±15.33 | 18.98±6.74     | < 0.0001 |
| AMH (ng/mL)                    | 10.96±4.75  | 4.78±3.20      | < 0.0001 |
| Fasting blood-glucose (mmol/L) | 5.46±0.65   | 5.34±0.31      | 0.4399   |
| HOMA-IR                        | 3.61±2.80   |                |          |

Data are presented as mean±SD, BMI: Body mass index, LH: luteinizing hormone, FSH: follicle stimulating hormone, T: testosterone, AMH: anti-Müllerian hormone, HOMA-IR: Fasting blood-glucose (mmol/L)\*fasting insulin (uU/ml)/22.5.

Table S4 Primers used in 5' and 3' RACE analysis

| Oligo            | Sequence 5'-3'                  |
|------------------|---------------------------------|
| 5'Inc-MAP3K13-R1 | GGCTCACCTCTTGCCTTCTAGGTCACT     |
| 5'Inc-MAP3K13-R2 | CCACCGGTTATTCCTAGGTTATATTAG     |
| 3'Inc-MAP3K13-F1 | GGCCCAGCTATTGTCTCTTTATCTCTTTGTC |
| 3'Inc-MAP3K13-F2 | CTGCACACAGGGAGAACACCTGCTAAG     |
| mlnc-MAP3K13-F   | GTGGGCGAAAGATTACCTAG            |
| mlnc-MAP3K13-R   | GTGCTCAGTAATCTGATGTAAAT         |

5'Inc-MAP3K13-R, reverse primer for gene specific primer of 5'RACE; 3'Inc-MAP3K13-F, forward primer for gene specific primer of 3'RACE; UPM, universal primer mix; mlnc-MAP3K13-F, forward primer for full length of lnc-MAP3K13-7:1; mlnc-MAP3K13-R, reverse primer for full length of lnc-MAP3K13-7:1.

Table S5 siRNA sequences used in cell knockdown assay

| Oligo Name | Sequence (5'-3') |                          | position |
|------------|------------------|--------------------------|----------|
| si-DNMT1-1 | sense            | GUCCCAAUAUGGCCAUGAAAdTdT | 2298     |
|            | antisense        | UUCAUGGCCAUAUUGGGACdTdT  |          |
| si-DNMT1-2 | sense            | CCACAGAUUCUGAUGAAAdTdT   | 1151     |
|            | antisense        | UUUCAUCAGAAAUCUGUGGdTdT  |          |
| si-DNMT1-3 | sense            | GAGGCCUAUAAUGCAAAGAdTdT  | 3485     |
|            | antisense        | UCUUUGCAUUAUAGGCCUCdTdT  |          |

Table S6 Primer sequences and amplification conditions used in RT-PCR analysis

| Target genes    | Primer sequences(5' → 3')               | Amplification condition                    |
|-----------------|-----------------------------------------|--------------------------------------------|
| lnc-MAP3K13-7:1 | F:5'-AAATATCAGCACGCCAGTC-3'             |                                            |
|                 | R:5'-TGTAGGGTCCAGTCCTACGG-3'            |                                            |
| lnc-MAP3K13-7:1 | F:5'-GCAAGAGGTGAGCCTTCTGT-3'            |                                            |
|                 | R:5'-AAGCTGGTGGAGCAGAGTGT-3'            |                                            |
| VPS8            | F:5'-GCTGAGGAGCTGGAGAGAGA-3'            |                                            |
|                 | R:5'-CTGAAAATGCTGCTCCATCA-3'            |                                            |
| NEAT1           | F:5'-<br>CTTCCTCCCTTTAACTTATCCATTCAC-3' |                                            |
|                 | R:5'-<br>CTCTTCCTCCACCATTACCAACAATAC-3' | Stage 1: 95 °C, 10s<br>Stage 2: 95 °C, 10s |
| UI              | F:5'-GGGAGATACCATGATCACGAAGGT-3'        | 60 °C, 20s                                 |
|                 | R:5'-<br>CCACAAATTATGCAGTCGAGTTTCCC-3'  | 72 °C, 20s<br>Number of cycles: 40         |
| ACTB            | F:5'-CTCCATCCTGGCCTCGCTGT-3'            | Stage 3: 95 °C, 5s                         |
|                 | R:5'-GCTGTACCTTCACCGTTCC-3'             | 65 °C, 1min                                |
| DNMT1           | F:5'-GTGGGGGACTGTGTCTCTGT-3'            | 4°C, ∞                                     |
|                 | R:5'-TGAAAGCTGCATGTCCTCAC-3'            |                                            |
| DNMT3A          | F:5'-AGCCCAAGGTCAAGGAGATT-3'            |                                            |
|                 | R:5'-CAGCAGATGGTGCAGTAGGA-3'            |                                            |
| DNMT3B          | F:5'-TTGAATATGAAGCCCCAAG-3'             |                                            |
|                 | R:5'-GGTTCCAACAGCAATGGACT-3'            |                                            |
| CDKN1A          | F:5'-AAGACCATGTGGACCTGTCACTGT-3'        |                                            |
|                 | R:5'-AGGGCTTCCTCTTGGAGAAGATCA-<br>3'    |                                            |
| TP53            | F:5'-GTTCCGAGAGCTGAATGAGG-3'            |                                            |
|                 | R:5'-TCTGAGTCAGGCCCTTCTGT-3'            |                                            |
| CDKN1B          | F:5'-ATGTCAAACGTGCGAGTGTC-3'            |                                            |
|                 | R:5'-TCTCTGCAGTGCTTCTCCAA-3'            |                                            |
| U6              | F:5'-GGAACGATACAGAGAAGATTAGC-3'         |                                            |
|                 | R:5'-TGGAACGCTTCACGAATTTGCG-3'          |                                            |

*VPS8*: Vacuolar protein sorting-associated protein 8; *NEAT1*: Nuclear paraspeckle assembly transcript 1; *U1*: Uridine-rich 1 small nuclear RNA; *ACTB*: Actin Beta; *DNMT1*: DNA (cytosine-5-)-methyltransferase 1; *DNMT3A*: DNA (cytosine-5-)-methyltransferase 3A; *DNMT3B*: DNA (cytosine-5-)-methyltransferase 3B; *CDKN1A*: Cyclin Dependent Kinase Inhibitor 1A; *TP53*: Tumor protein 53; *CDKN1B*: Cyclin Dependent Kinase Inhibitor 1B; *U6*: Uridine-rich 1 small nuclear RNA.



Table S7 Primary antibodies used in western blot analysis

| Peptide/ protein target | Host                 | Dilution used                                 | Manufacturer              |
|-------------------------|----------------------|-----------------------------------------------|---------------------------|
| GAPDH                   | Mouse<br>Monoclonal  | 1:5000                                        | Proteintech Group Inc     |
| $\beta$ -Actin          | Mouse<br>Monoclonal  | 1:3000                                        | Proteintech Group Inc     |
| DNMT1                   | Rabbit<br>Polyclonal | 1:1000 for WB<br>5 $\mu$ g for each IP sample | Abcam                     |
| DNMT3a                  | Rabbit<br>Monoclonal | 1:1000                                        | Abcam                     |
| Rb                      | Mouse<br>Monoclonal  | 1:2000                                        | Cell Signaling Technology |
| Phospho-Rb(Ser807/811)  | Rabbit<br>Monoclonal | 1:1000                                        | Cell Signaling Technology |
| Cyclin E1               | Mouse<br>Monoclonal  | 1:500                                         | Proteintech Group Inc     |
| PCNA                    | Rabbit<br>Monoclonal | 1:1000                                        | Cell Signaling Technology |
| CDK2                    | Mouse<br>Monoclonal  | 1:1000                                        | Cell Signaling Technology |
| Phospho-CDK2(Thr160)    | Rabbit<br>Monoclonal | 1:1000                                        | Cell Signaling Technology |
| p21(Waf1/Cip1)          | Rabbit<br>Monoclonal | 1:1000                                        | Cell Signaling Technology |
| Ubiquitin               | Mouse<br>Monoclonal  | 1:1000                                        | Cell Signaling Technology |

Table S8 Primers of pyrosequencing in CDKN1A promoter region

| Primer Set           |                                                                                                                                                                                       |                                                                                                                           | Score: 74<br>Quality: Medium |        |      |
|----------------------|---------------------------------------------------------------------------------------------------------------------------------------------------------------------------------------|---------------------------------------------------------------------------------------------------------------------------|------------------------------|--------|------|
| Primer               | Id                                                                                                                                                                                    | Sequence                                                                                                                  | Nt                           | Tm, °C | %GC  |
| ↘PCR                 | F1                                                                                                                                                                                    | AGGAATTGATTTAGGTAGTTGTTTATAT                                                                                              | 28                           | 56.0   | 25.0 |
| ↙PCR                 | R1                                                                                                                                                                                    | ACTAAAACCTCCACCAAACCTCAACTAACTC                                                                                           | 29                           | 58.6   | 37.9 |
| → Sequencing         | S1                                                                                                                                                                                    | ATTGATTTAGGTAGTTGTTTATATT                                                                                                 | 25                           | 42.7   | 20.0 |
| Target Polymorphisms | Position1, Position2, Position3, Position4, Position5, Position6, Position7, Position8, Position9, Position10, Position11, Position12, Position13, Position14, Position15, Position16 |                                                                                                                           |                              |        |      |
| Sequence Analyze     | to                                                                                                                                                                                    | TTAGTTGGYG TAGTTAGYG YGGTTTTGAT ATATAATYGT TTYGTTYGGG<br>TTYGTTTTAA GGAGGYGGGA TTYGYGTTYG GTTTATYGYG TYGTTYGGGA<br>TYGTTT |                              |        |      |
| Amplicon length      | 198                                                                                                                                                                                   |                                                                                                                           |                              |        |      |
